# Supplementary material
Source: Springer Nature journal article supplement (https://www.springermedizin.de/resource/supplementary/12885_2010_2569_MOESM7_ESM.pdf/9462588)

**A****Thoc1**

|                                                                                   |          |
|-----------------------------------------------------------------------------------|----------|
|    | strong   |
|   | weak     |
|  | negative |

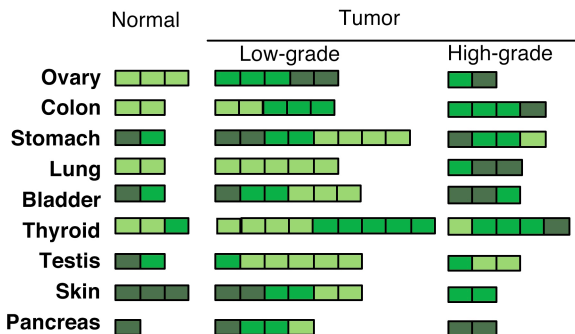**B**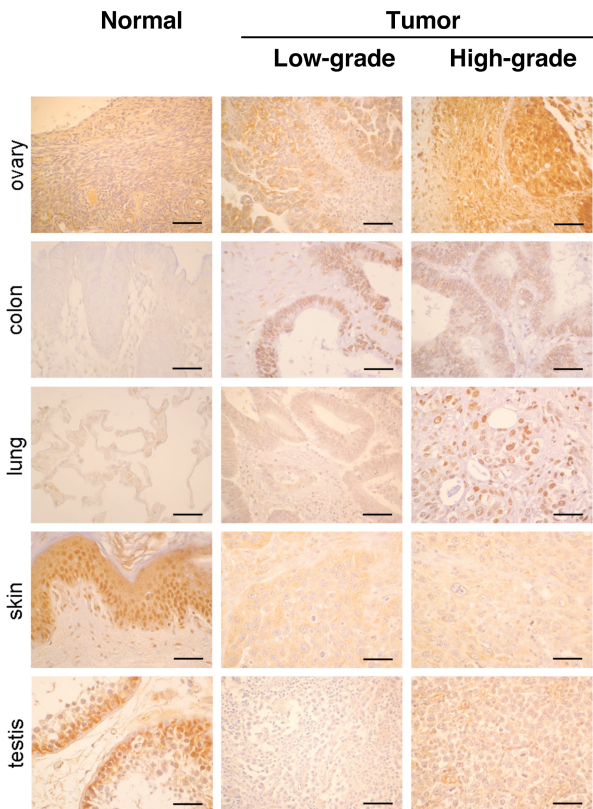

Supplement: MOESM7 [file 9462588]
